## Establishment of POP-1 asymmetry in early *C. elegans* embryos

Frederick D. Park and James R. Priess

Division of Basic Sciences, Howard Hughes Medical Institute, Fred Hutchinson Cancer Research Center, Seattle, WA 98109, USA

Accepted 24 April 2003

### SUMMARY

In *Caenorhabditis elegans* embryos, the nuclei of sister cells that are born from anterior/posterior divisions show an invariant high/low asymmetry, respectively, in their level of the transcription factor POP-1. Previous studies have shown that POP-1 asymmetry between the daughters of an embryonic cell called EMS results in part from a Wnt-like signal provided by a neighboring cell, called P<sub>2</sub>. We identify here additional signaling cells that play a role in POP-1 asymmetry for other early embryonic cells. Some of these

cells have signaling properties similar to P<sub>2</sub>, whereas other cells use apparently distinct signaling pathways. Although cell signaling plays a critical role in POP-1 asymmetry during the first few cell divisions, later embryonic cells have an ability to generate POP-1 asymmetry that appears to be independent of prior Wnt signaling.

Key words: *C. elegans*, Frizzled, polarity, POP-1, Wnt

### INTRODUCTION

The pattern of cell cleavage and differentiation in *C. elegans* is largely invariant (Sulston et al., 1983; Schnabel et al., 1997). The spindles of most cells are oriented such that mitosis generates an anterior daughter and a posterior daughter, and most of the early anterior/posterior (a/p) cell divisions result in sister cells with different fates. Although these fates are determined through diverse pathways, several studies have suggested that cells throughout the embryo recognize a common a/p coordinate system in choosing their fates (Mello et al., 1992; Hutter and Schnabel, 1994; Mango et al., 1994; Moskowitz et al., 1994; Way et al., 1994). Recent studies have provided considerable evidence for this hypothesis, and have begun to identify molecular components of the a/p system (Lin et al., 1995; Lin et al., 1998; Kaletta et al., 1997; Meneghini et al., 1999; Rocheleau et al., 1999; Rocheleau et al., 1997; Thorpe et al., 1997; Maduro et al., 2002). The transcription factor POP-1 is present in the nuclei of all early embryonic, and several postembryonic, cells. After an embryonic cell divides, its anterior daughter invariably shows a higher level of nuclear POP-1 than its posterior daughter. Thus each a/p pair of sister cells exhibits POP-1 asymmetry with a reproducible high/low polarity. Conditions that result in high POP-1 in the posterior sister cause an anterior transformation in fate, whereas the absence of POP-1 in the anterior sister causes a posterior transformation in fate. POP-1 functions in a variety of cell-type decisions, including mesodermal/endodermal choices and epidermal/neuronal choices. These observations suggest that POP-1 asymmetry provides the a/p coordinate system that collaborates with more widely expressed transcription factors to diversify sister cells.

POP-1 is related to TCF/Pangolin, a transcriptional effector of the canonical Wnt signaling pathway, and POP-1 has been shown to function in canonical Wnt signaling during larval

development (Lin et al., 1995; Herman, 2001). However, POP-1 asymmetry in the early embryo is regulated by a non-canonical Wnt pathway, with parallel input from a mitogen-activated protein kinase (MAPK) pathway (for a review, see Korswagen, 2002). Components of these pathways include MOM-2/Wnt, MOM-5/Frizzled, WRM-1/beta-catenin, MOM-4/MAPKKK/TAK1 and LIT-1/Nemo. Sister cells show POP-1 asymmetry because they differ in their nucleocytoplasmic distributions of POP-1 (Maduro et al., 2002). Studies with cultured vertebrate cells suggest that WRM-1/beta-catenin can activate LIT-1/Nemo, resulting in phosphorylated POP-1 that accumulates in the cytoplasm (Rocheleau et al., 1999).

How is the a/p polarity system established? The most detailed experimental studies to date have focused on the development of the EMS cell (Goldstein, 1992; Goldstein, 1993). EMS divides into an anterior, mesodermal precursor and a posterior, endodermal precursor. This a/p polarity is induced during the 4-cell stage of embryogenesis by a neighboring cell called P<sub>2</sub>. For example, removing P<sub>2</sub> causes both EMS daughters to have anterior fates (high POP-1) and repositioning P<sub>2</sub> on the opposite surface of EMS reverses the polarity of the division.

Relatively little is known about the cellular events that establish a/p polarity in other embryonic cells. At the 2-cell stage, the posterior cell is called P<sub>1</sub> (the parent of P<sub>2</sub> and EMS) and the anterior cell is called AB (see Fig. 1). Within the AB lineage, POP-1 asymmetry is first detectable after the third division of AB, when there are four a/p sister pairs of AB descendants (Lin et al., 1998); for convenience we refer to this stage as the AB<sup>8</sup> stage. POP-1 function is essential for a/p differences in cell fate within each of the four sister pairs of AB<sup>8</sup> cells (Lin et al., 1998). Previous studies on how a/p differences are generated in the AB lineage have reached contradictory conclusions. In one set of experiments, AB was

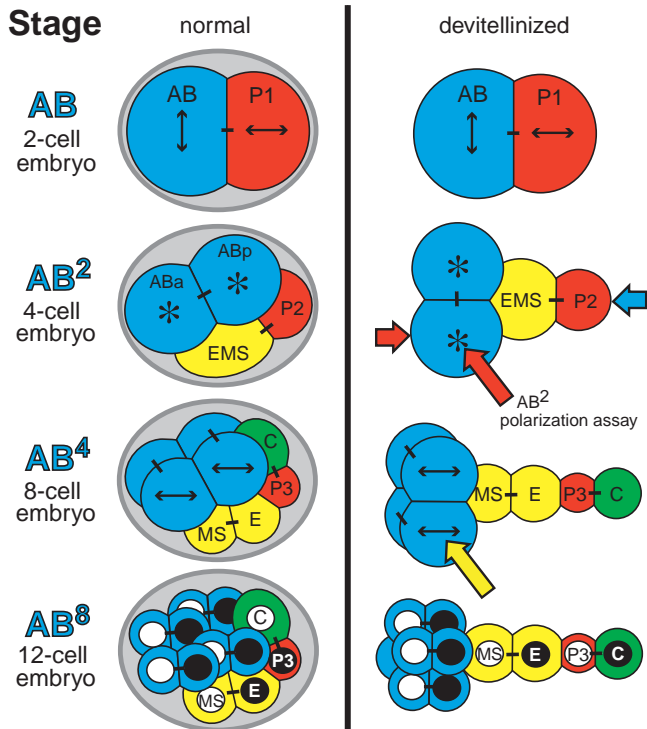

**Fig. 1.** Early cleavages and POP-1 asymmetry. Schematic diagram of normal and devitellinized embryos from first cleavage to the AB<sup>8</sup> stage; anterior is left in all drawings. Descendants of AB are shown in blue and descendants of EMS are shown in yellow. Sister cells are connected by short black lines. For some cells, the axis of the subsequent division is shown with either a double-headed arrow (division within the plane) or an asterisk (divisions into the plane). At the AB<sup>8</sup> stage, levels of POP-1 are indicated as high (white nuclei) or low (black nuclei). Note that POP-1 polarity is reversed in the P<sub>2</sub> daughters of devitellinized embryos. Red, blue and yellow arrows on devitellinized embryos indicate positions of graft cells described in the text.

separated from P<sub>1</sub> and allowed to develop to the AB<sup>16</sup> stage (Wittmann et al., 1997). As many as eight of the AB<sup>16</sup> cells expressed a transgenic marker that normally is expressed in the eight posterior AB<sup>16</sup> cells, suggesting that AB has an inherent a/p polarity. In a different study, videomicroscopy was used to follow AB development after killing P<sub>1</sub> or P<sub>1</sub> descendants (Hutter and Schnabel, 1995). Several AB<sup>8</sup> cells showed posterior to anterior transformations in fate after killing P<sub>1</sub>, but not P<sub>1</sub> descendants, suggesting that P<sub>1</sub> induces an a/p polarity in AB that is maintained in a latent form until the AB<sup>8</sup> stage.

To further analyze the cellular basis for a/p polarity in the AB lineage, we analyzed POP-1 levels directly by immunostaining isolated and cultured embryonic cells. Our results indicate that POP-1 asymmetry at the AB<sup>8</sup> stage results from interactions with specific P<sub>1</sub> descendants, rather than with P<sub>1</sub>. These interactions are mediated in part by MOM-2/Wnt signaling. Surprisingly, by the AB<sup>16</sup> stage embryonic cells have acquired an ability to generate POP-1 asymmetry that appears to be independent of MOM-2/Wnt signaling or prior interactions with other cells, but that requires MOM-5/Frizzled.

## MATERIALS AND METHODS

### Strains and alleles

Nematodes were cultured as in Brenner (Brenner, 1974). The wild-type Bristol strain N2 was used. The following mutations were used. LGI, *mom-5(or57)*, *dpy-5(e61)*, *mom-4(or39)* and *unc-13(e1091)*; LGV, *mom-2(or42)* and *dpy-11(e1180)*; LGX, *mom-1(or10)* and *unc-6(n102)*. The following integrated transgene containing green fluorescent protein (GFP) reporter was used: *zuls3(end-1::GFP)* (Nance and Priess, 2002).

### Cell isolations

Individual embryonic cells were isolated from devitellinized embryos by gently drawing embryos in and out of a drawn-out capillary needle as described previously (Edgar, 1995). Cells were cultured in medium consisting of 5% L-15 (Gibco), 10% fetal calf serum (Gibco), and 4.7% sucrose, adjusted to 320–330 mOsm. To devitellinize embryos, eggs were placed in hypochlorite solution [6% NaOCl, 2.5 N KOH] on an inverted microscope slide for 3.5 minutes, then rinsed three times with 0.25 M HEPES, pH 7.0 before transfer to culture medium.

### Immunostaining and analysis of embryos and cultured blastomeres

Isolated cells were micropipetted directly into a drop of fixative [2% paraformaldehyde, 60 mM PIPES, 25 mM HEPES (pH 6.8), 10 mM EGTA, 2 mM MgCl<sub>2</sub>] on a poly-L-lysine (Sigma)-coated glass slide. After five minutes, excess fixative was removed and slides were placed in –20°C acetone for 5 minutes. Cells were rinsed twice in Tris-Tween [100 mM Tris-HCl (pH 7.5), 200 mM NaCl, 0.1% Tween], then incubated with 10% normal goat serum (Gibco) in Tris-Tween at room temperature for 30 minutes. Cells were then incubated overnight at room temperature with primary antisera. Fixation and immunostaining of intact embryos was as described previously (Lin et al., 1998). The following dilutions of antibodies/antisera were used: anti POP-1 [1:2500 mouse mABRL2 (P4G4) (Lin et al., 1998)]; midbody staining [1:50 rabbit anti-PKL-2 (kindly provided by M. Land)]; P-granules [1:17000 rabbit anti-PGL-1 (Kawasaki et al., 1998)]. Secondary antibodies were conjugated to either Cy-3 (Jackson ImmunoResearch Laboratories) or FITC (Tago). Cells were stained with DAPI (4,6-diamidino-2-phenylindole) at 60 ng/ml for five minutes. POP-1 was scored only when the PKL-2 staining pattern provided an unambiguous indication of sister pairs, thus some results are scored by the number of sister pairs rather than by the number of experiments.

### dsRNA-mediated interference (RNAi)

Standard techniques were used to synthesize double-stranded RNA (dsRNA) from T7 promoter-tagged, PCR-amplified genomic DNA from *mom-2*, *mom-5*, *goa-1*, and *gpa-16*. PCR primers were chosen to span exons and generate fragments between 0.5 and 2 kb in size. L4 or young adult hermaphrodites were soaked overnight with dsRNA (Tabara et al., 1998).

## RESULTS

### POP-1 asymmetry in wild-type embryos

The first division of the fertilized egg results in an anterior cell called AB and a posterior cell called P<sub>1</sub> (Fig. 1). Each of the descendants of these cells has a distinct name in *C. elegans* nomenclature, however it is convenient here to refer to the AB descendants collectively. For example, there are two AB daughters in a 4-cell embryo, so we refer to these daughters as the AB<sup>2</sup> cells and to the developmental stage as the AB<sup>2</sup> stage. The descendants of the P<sub>1</sub> cell are indicated by their standard names such as MS or E. Previous reports have analyzed POP-

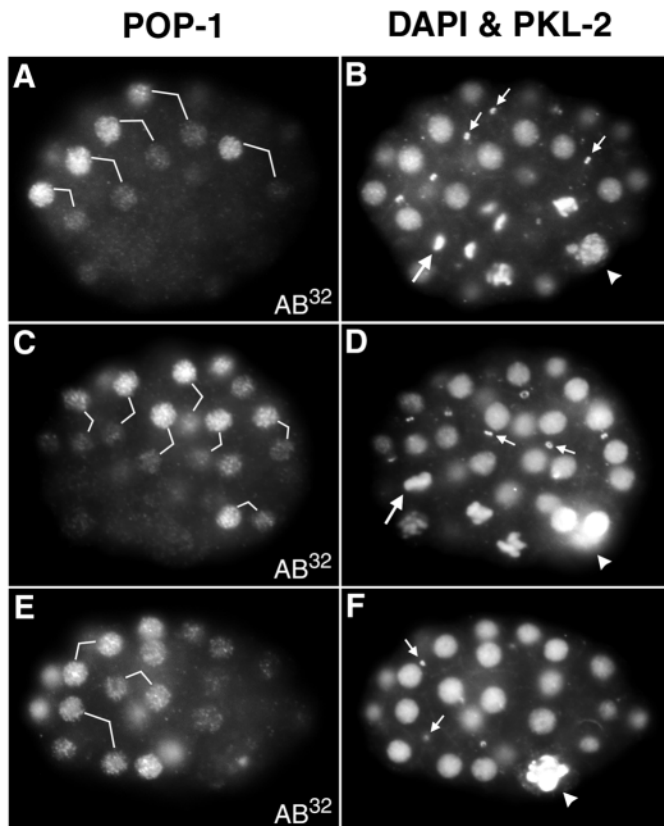

**Fig. 2.** POP-1 in wild-type and *mom* mutant embryos. Images are of AB<sup>32</sup> stage embryos. (A,B) Wild-type. (C,D) *mom-2(or42)* mutant. (E,F) *mom-2(or42);mom-5(RNAi)* embryo. Left panels show embryos stained for POP-1; chevrons indicate examples of sister cells. Right panels show DAPI and PKL-2 images superimposed; small arrows indicate examples of midbodies between sister pairs. For each of the sister pairs indicated in D (small arrows), the anterior sister has low POP-1. POP-1 staining is cell cycle-dependent and not detected in prophase or anaphase nuclei (large arrows in B,D) (see also Lin et al., 1995). In all panels anterior is left; in B,D and F ventral is down (arrowhead indicates the P<sub>4</sub> cell).

1 asymmetry in all cells up to the 28-cell stage, and POP-1 asymmetry has been observed in E descendants and a few MS descendants in later embryos (Lin et al., 1998; Maduro et al., 2002). To identify sister cells in older embryos and in cell culture experiments, we used a POP-1 antibody in conjunction with an antiserum against the kinase PKL-2. This antiserum stains the midbody, or cell-division remnant, between sister cells (small arrows in Fig. 2B) (M. Land and C. S. Rubin, unpublished). Using fixed and immunostained embryos at various stages, we identified each of the first 32 descendants of the MS cell, all of the AB<sup>8</sup>, AB<sup>16</sup> and AB<sup>32</sup> sister pairs, and a large subset of the AB<sup>64</sup> and AB<sup>128</sup> sister pairs (Fig. 2A,B and Materials and Methods). For each sister pair, POP-1 was high in the anterior sister and low in the posterior sister, suggesting that POP-1 asymmetry is reiterated with the same polarity after most, if not all, a/p divisions within the embryo.

#### **P<sub>1</sub> descendants are required for POP-1 asymmetry at the AB<sup>8</sup> stage**

In normal embryogenesis, POP-1 asymmetry is first evident in

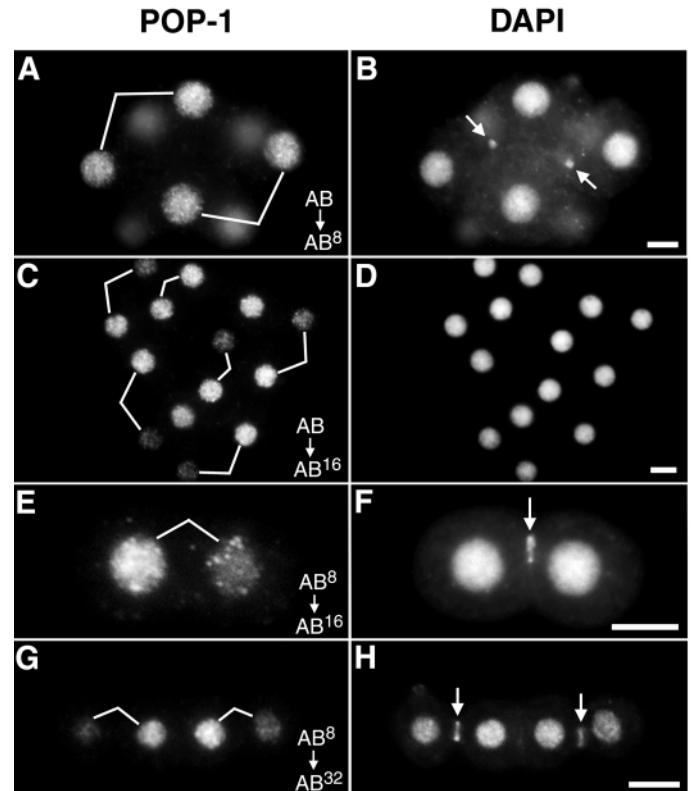

**Fig. 3.** POP-1 in isolated AB descendants. (A,B) AB<sup>8</sup> descendants of an isolated AB cell. (C,D) AB<sup>16</sup> descendants of an isolated AB cell; the cell cluster has been flattened to visualize the majority of nuclei. (E,F) AB<sup>16</sup> daughters of a sequentially isolated AB<sup>8</sup> cell. (G,H) AB<sup>32</sup> granddaughters of a sequentially isolated AB<sup>8</sup> cell. POP-1 staining (left), corresponding DAPI-stained images (right); images of PKL-2 staining are superimposed on B,F and H with midbodies indicated by small arrows. Scale bars: 5  $\mu$ m.

AB descendants at the AB<sup>8</sup> stage (Lin et al., 1998). To examine POP-1 in cultured cells, we removed the eggshell from 2-cell stage embryos and allowed the devitellinized embryos to develop to the AB<sup>8</sup> stage (see Fig. 1 for a comparison of cell positions in normal and devitellinized embryos). POP-1 asymmetry was observed between most sister pairs of AB<sup>8</sup> cells in devitellinized but otherwise intact embryos (78%, 32 sister pairs scored) and in embryos in which AB and P<sub>1</sub> were separated then immediately recombined (78%, 32 sister pairs). POP-1 asymmetry was not detectable between any sister pairs of AB<sup>8</sup> cells when AB was kept separate from P<sub>1</sub> (0%, 56 sister pairs scored; Fig. 3A,B) or when AB was allowed to contact P<sub>1</sub> only through the first cell cycle (0%, 44 sister pairs). These results indicate that signaling from P<sub>1</sub> is not sufficient for POP-1 asymmetry between sister pairs of AB<sup>8</sup> cells, and instead suggest that P<sub>1</sub> descendants influence POP-1 asymmetry.

#### **AB cleavage orientation and P<sub>2</sub> signaling**

In *C. elegans* and other animals, Wnt proteins are secreted and can signal non-adjacent target cells (Whangbo et al., 2000; Zecca et al., 1996; Neumann and Cohen, 1997). Because P<sub>2</sub>, a daughter of P<sub>1</sub>, expresses MOM-2/Wnt and signals EMS, in principle P<sub>2</sub> might signal the AB descendants. However, a previous study showed that P<sub>2</sub> is not essential for POP-1



asymmetry in the AB<sup>8</sup> cells (Lin et al., 1998). We have confirmed this result using our modified conditions of cell isolation and culture; most sister pairs of AB<sup>8</sup> cells show POP-1 asymmetry after P<sub>2</sub> is removed from a 4-cell embryo (85%, 48 sister pairs). Moreover, P<sub>2</sub> is not sufficient for POP-1 asymmetry; although P<sub>2</sub> normally contacts one of the AB<sup>2</sup> cells, called ABp, the daughters of ABp do not exhibit POP-1 asymmetry.

Why does P<sub>2</sub> signaling fail to alter POP-1 levels in the ABp daughters? Because P<sub>2</sub> has been shown to interact with ABp, but not EMS, through a separate, Notch-related signaling pathway, we wondered whether this pathway precluded POP-1 asymmetry. However, embryos that were depleted of the receptor GLP-1/Notch by *glp-1(RNAi)* did not show POP-1 asymmetry at the ABp division, similar to wild-type embryos (0/5). A second possibility is that the transverse divisions of the AB<sup>2</sup> cells, perpendicular to P<sub>2</sub>, prevent POP-1 asymmetry. A previous study noted that EMS may fail to respond to induction if it divides perpendicular to, rather than in line with, P<sub>2</sub>, although this analysis is complicated by the fact that signaling from P<sub>2</sub> normally orients the EMS division (Goldstein, 1995). To examine whether division orientation influenced POP-1 asymmetry, we used RNAi to inhibit the functions of the G alpha proteins encoded by *goa-1* and *gpa-16* (see Materials and Methods); such embryos appear to have random spindle orientations (Gotta and Ahringer, 2001; Zwaal et al., 1996). We observed that a/p, but not transverse, divisions of EMS resulted in POP-1 asymmetry (6/6 and 0/5, respectively; Fig. 4A). Similarly, a/p, but not transverse, divisions of the AB<sup>2</sup> cells resulted in POP-1 asymmetry (4/4 and 0/4, respectively; Fig. 4A). When the functions of *goa-1* and *gpa-16* were inhibited in *mom-2(or42)* mutant embryos, POP-1 asymmetry was not detectable after either an a/p, or transverse, division of the AB<sup>2</sup> daughters (0/12 and 0/6, respectively). As a second method for altering the AB<sup>2</sup> division axis, a laser microbeam was used to fuse the AB<sup>2</sup> daughters together immediately after their birth. As a fused AB<sup>2</sup> cell enters mitosis, it often develops two largely separate spindles that orient a/p. After the tetrapolar division, the posterior daughters usually showed lower levels of nuclear POP-1 than the anterior daughters (16/18 sister pairs; Fig. 4C).

We used devitellinized embryos to further examine interactions between P<sub>2</sub> and the AB<sup>2</sup> cells. In devitellinized embryos, as in normal embryos, the division axes of the AB<sup>2</sup> cells are oriented transversely with respect to the position of EMS (asterisks in Fig. 1). We found that the AB<sup>2</sup> divisions remained approximately transverse after P<sub>2</sub> was removed (32/32 embryos), or after a graft P<sub>2</sub> was placed on various surfaces of one or both AB<sup>2</sup> cells (22/22 embryos). We conclude that the presence or absence of P<sub>2</sub> does not significantly alter the transverse division axis of an AB<sup>2</sup> cell. When a graft P<sub>2</sub> was positioned perpendicular to the predicted AB<sup>2</sup> division axis (short red arrow in Fig. 1), POP-1 asymmetry was not observed between either pair of AB<sup>2</sup> daughters (0/8 embryos). In the next set of experiments the graft P<sub>2</sub> was placed in line with the predicted division axis of one of the AB<sup>2</sup> cells (long red arrow in Fig. 1); we refer to this experimental paradigm as the AB<sup>2</sup> polarization assay. In each of these experiments, the AB<sup>2</sup> cell in contact with the graft P<sub>2</sub> divided into daughters with POP-1 asymmetry (6/6; Fig. 4E,F).

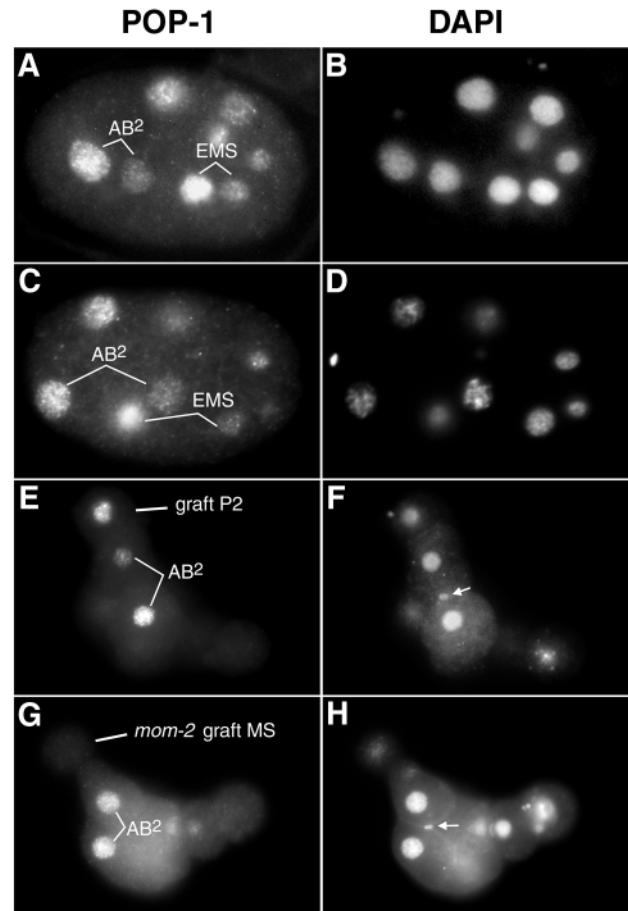

**Fig. 4.** Generation of POP-1 polarity at the AB<sup>2</sup> division. (A,B) Example of an a/p division of an AB<sup>2</sup> cell in a *goa-1(RNAi);gpa-16(RNAi)* embryo; EMS also divided a/p. (C,D) Division of laser-fused AB<sup>2</sup> cells in a wild-type embryo. (E,F) Division of an AB<sup>2</sup> cell in a devitellinized wild-type embryo after grafting on a wild-type P<sub>2</sub>. (G,H) Division of an AB<sup>2</sup> cell in a devitellinized wild-type embryo after grafting on a *mom-2* mutant P<sub>2</sub>. Panels labeled as in Fig. 2; images of PKL-2 staining are superimposed on the DAPI images in F and H with midbodies indicated by arrows.

The daughter distal to P<sub>2</sub> had high POP-1 and the proximal daughter had low POP-1, similar to the high/low POP-1 polarity that P<sub>2</sub> normally induces in the distal/proximal daughters of EMS. The AB<sup>2</sup> cell that was not in contact with the graft P<sub>2</sub> divided into daughters lacking POP-1 asymmetry (6/6). In a reciprocal experiment, a pair of AB<sup>2</sup> cells was isolated and grafted onto the P<sub>2</sub> cell of an intact, devitellinized host embryo (position indicated by blue arrow in Fig. 1). In this configuration, the P<sub>2</sub> cell of the host embryo is in contact simultaneously with the host EMS and one of the graft AB<sup>2</sup> cells, analogous to the pattern of cell contacts that P<sub>2</sub> makes in normal 4-cell embryos. In each case in which the graft AB<sup>2</sup> cell divided in line with P<sub>2</sub>, the daughters of that AB<sup>2</sup> cell showed high/low POP-1 polarity with respect to P<sub>2</sub> (5/5). Taken together, these results suggest that ABp in normal embryogenesis has the potential to respond to signaling from P<sub>2</sub>, and that interactions between P<sub>2</sub> and EMS do not preclude P<sub>2</sub> from simultaneously signaling ABp. Instead, the transverse

**Table 1. Identification of signaling cells**

| Candidate    | Assay*          | Daughters with POP-1 asymmetry/n |       |
|--------------|-----------------|----------------------------------|-------|
| Wild type    | AB <sup>2</sup> | 0/3                              |       |
|              | AB <sup>4</sup> | 0/7                              |       |
|              | AB <sup>8</sup> | 0/13                             |       |
|              | P <sub>1</sub>  | 0/5                              |       |
|              | EMS             | 0/11                             |       |
|              | P <sub>2</sub>  | 6/6                              |       |
|              | P <sub>3</sub>  | 4/4                              |       |
|              | MS              | 5/6 (weak)                       |       |
|              | E               | 3/3                              |       |
|              | C               | 8/8                              |       |
| <i>mom-2</i> | P <sub>2</sub>  | 0/8                              |       |
|              | C               | 0/12                             |       |
|              | MS              | 3/6 (weak)                       |       |
| Wild type    | None            | 0/10                             |       |
|              | AB <sup>4</sup> | 0/38                             |       |
|              | MS              | 9/9                              |       |
|              | E               | 6/7                              |       |
|              | C               | 12/13                            |       |
|              | <i>mom-2</i>    | C                                | 0/6   |
| Wild type    | MS              | 15/15                            |       |
|              |                 | (6 strong, 9 weak)               |       |
| Wild type    | C               | AB <sup>16</sup>                 | 14/14 |

\*Assays using AB<sup>2</sup> cells were on devitellinized wild-type embryos (AB<sup>2</sup> polarization assay). All other assays were on individual wild-type cells as listed.

division of ABp appears to prevent it from responding to P<sub>2</sub>, such that POP-1 remains high in both ABp daughters.

### P<sub>1</sub> descendants induce high/low POP-1 polarity

The AB<sup>2</sup> polarization assay described above (long red arrow in Fig. 1) was used to examine the signaling properties of several cells in the early embryo. We found that graft AB<sup>2</sup>, AB<sup>4</sup>, AB<sup>8</sup>, P<sub>1</sub> and EMS cells could not induce POP-1 asymmetry in this assay (Table 1). In contrast, the P<sub>1</sub> descendants E, C and P<sub>3</sub> appeared equivalent to P<sub>2</sub> in their ability to induce POP-1 asymmetry with high/low polarity (Table 1). The P<sub>1</sub> descendant MS usually induced POP-1 asymmetry, however the asymmetry was markedly less than that observed with the other P<sub>1</sub> descendants (data not shown).

Previous experiments by others have demonstrated that a signal from P<sub>2</sub> aligns the EMS division axis and induces the proximal EMS daughter (E) to lengthen its cell cycle and to undergo endodermal differentiation (Goldstein, 1992; Goldstein, 1993). To further compare the signaling properties of MS, E and C with P<sub>2</sub>, each of these cells was grafted onto an isolated EMS cell. Similar to P<sub>2</sub>, both E and C were able to align the EMS division axis and to induce the proximal EMS daughter to lengthen its cell cycle and to undergo endodermal differentiation (6/7, 8/8 and 8/8 experiments, respectively; Fig. 5E,F). MS was unable to align the EMS spindle and did not induce endoderm-specific differentiation (0/9 experiments). We conclude that E, C and P<sub>2</sub>, and to a lesser extent MS, can induce POP-1 polarity, and that the signaling properties of E and C appear identical to those reported previously for P<sub>2</sub>.

MS, E and C are born during the AB<sup>4</sup> stage and make extensive cell contacts with AB descendants (see below). Thus interactions at the AB<sup>4</sup> stage might generate POP-1 asymmetry at the AB<sup>8</sup> stage. We found that the daughters of an isolated

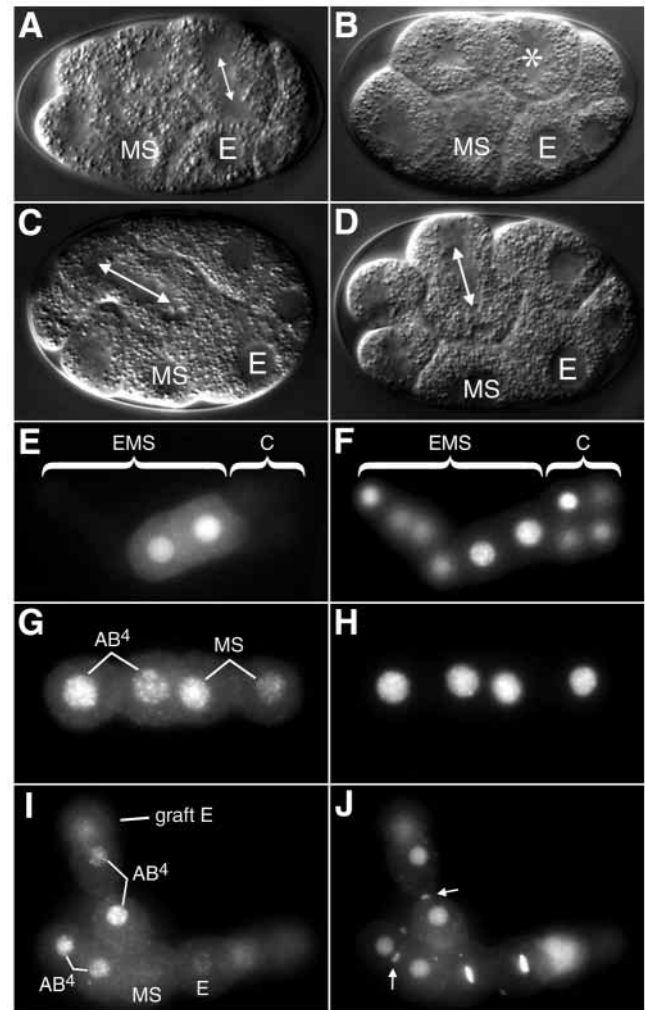

**Fig. 5.** Signaling by P<sub>1</sub> descendants. (A-D) Nomarski photomicrographs showing the division of ABp in (A) wild-type and (B) *mom-2(or42)* embryos, and the division of ABp in (C) wild-type and (D) *mom-2(or42)* embryos; the asterisk indicates a division into the focal plane. (E) GFP expression of an endoderm-specific transgene after combining isolated EMS and C cells; DAPI staining of the same cells is shown in F. At the time of fixation the EMS daughter distal to C had divided twice, whereas the proximal EMS daughter divided only once. (G) POP-1 expression after the division of combined AB<sup>4</sup> and MS cells; DAPI staining is shown in H. (I) POP-1 expression after the division of the AB<sup>4</sup> cells in a devitellinized embryo. Prior to cell division, a graft E cell was placed on one of the AB<sup>4</sup> cells. Note that AB<sup>4</sup> daughter proximal to E has low POP-1. J shows superimposed DAPI and PKL-2 images with arrows indicating midbodies.

AB<sup>4</sup> cell did not show POP-1 asymmetry (Table 1). However, when an MS, E or C cell was grafted onto an isolated AB<sup>4</sup> cell, the AB<sup>4</sup> daughters showed high/low POP-1 polarity in almost all cases (Fig. 5G,H; Table 1). Surprisingly, in each experiment the spindle of the AB<sup>4</sup> cell appeared to align with the signaling cell, in contrast to the spindles of AB<sup>2</sup> cells. Grafting an AB<sup>4</sup> cell onto a second AB<sup>4</sup> cell never resulted in POP-1 asymmetry (Table 1), and these cells showed only infrequent, and probably random, alignment of their spindles (7/38 had aligned spindles). Thus, MS, E and C have the ability to align the AB<sup>4</sup>

spindles and to induce high/low POP-1 polarity in the AB<sup>4</sup> daughters. The ability of AB descendants to respond to signaling persists until at least the AB<sup>16</sup> stage; isolated AB<sup>16</sup> cells that were combined with C divided into daughters with high/low POP-1 polarity relative to C (Table 1).

Videomicroscopy was used to examine the cell contacts and spindle orientations of the four AB<sup>4</sup> cells in live embryos ( $n=12$ ); these cells are named ABal, ABar, ABpl and ABpr. ABal contacts only MS, and its spindle normally orients toward MS. ABpr and ABpl contact MS, E and C simultaneously, however their spindles orient toward E and often move slightly toward E before cell division (Fig. 5A,C). Finally, ABar contacts C and MS, and its spindle is oriented approximately between C and MS. The observation that three of the AB<sup>4</sup> cells contact multiple signaling cells simultaneously suggests that the AB<sup>4</sup> cells distinguish, or integrate, the various signals. We used devitellinized 8-cell embryos to test whether an AB<sup>4</sup> cell could distinguish between signals from MS and E. In devitellinized embryos, the spindles of the AB<sup>4</sup> cells usually orient toward MS (see Fig. 1), and the AB<sup>4</sup> daughters that show POP-1 asymmetry invariably have high/low POP-1 polarity with respect to the position of MS. We therefore grafted an E cell onto one of the AB<sup>4</sup> cells of a host embryo at a site either opposite, or orthogonal, to the site of contact with MS (yellow arrow in Fig. 1). In each of six experiments, the spindle of the AB<sup>4</sup> cell aligned toward the graft E, rather than the host MS, and divided with high/low POP-1 polarity relative to the graft E (Fig. 5I,J). We conclude that signaling from E predominates over signaling from MS. Similarly, we infer that signaling from C may predominate over MS signaling in normal development because POP-1 polarity in ABar is high/low relative to C, rather than MS.

### MOM-2/Wnt and POP-1 asymmetry at the AB<sup>8</sup> stage

Consistent with previous results by others, we found that *mom-2* mutants at the AB<sup>8</sup> stage had a partial loss of POP-1 asymmetry between sister pairs of AB<sup>8</sup> cells (Table 2) (see also Lin et al., 1998; Meneghini et al., 1999). To examine the role of MOM-2/Wnt in signaling, we isolated individual cells from *mom-2(or42)* mutant embryos to use as graft cells in the AB<sup>2</sup> polarization assay with a wild-type host embryo. Graft P<sub>2</sub> or C cells from a *mom-2(or42)* mutant were unable to induce POP-1 asymmetry in this assay, whereas the MS cell sometimes induced weak POP-1 asymmetry (Table 1; the E cell adopts an MS-like fate in *mom-2* mutants, and was not tested separately). We next grafted either a C or MS cell from a *mom-2(or42)* mutant onto an isolated, wild-type AB<sup>4</sup> cell. Similar to the above results, C did not align the AB<sup>4</sup> spindle (0/6) and did not induce POP-1 asymmetry between the AB<sup>4</sup> daughters (Table 1). In contrast, MS aligned the AB<sup>4</sup> spindle (15/15) and induced high/low POP-1 polarity with either a wild-type or reduced level of POP-1 asymmetry (Fig. 5G and Table 1). We conclude that MOM-2/Wnt is essential for signaling from C, but not MS. As described above, in wild-type development one AB<sup>4</sup> cell (ABar) contacts MS and C simultaneously, and the ABar daughters show high/low POP-1 polarity with respect to C. In *mom-2(or42)* mutant embryos, POP-1 asymmetry often was not detectable between the daughters of ABar (7/13 embryos). However, when present, the POP-1 polarity was reversed and oriented

**Table 2. POP-1 asymmetry in *mom* mutant embryos**

|                  | Sister pairs [%( <i>n</i> )] |                    |                                     |                    |
|------------------|------------------------------|--------------------|-------------------------------------|--------------------|
|                  | <i>mom-2(or42)</i>           | <i>mom-5(RNAi)</i> | <i>mom-2(or42);<br/>mom-5(RNAi)</i> | <i>mom-4(or39)</i> |
| AB <sup>8</sup>  | 54 (63)                      | 13 (16)            | 0 (24)                              | 0 (32)             |
| AB <sup>16</sup> | 95 (52)                      | 65 (23)            | 0 (54)                              | 0 (104)            |
| AB <sup>32</sup> | 100 (101)                    | 84 (55)            | 0 (24)                              | 0 (144)            |
| EMS <sup>2</sup> | 53 (15)                      | 100 (7)            | 0 (7)                               | 63 (19)            |
| EMS <sup>4</sup> | 53 (40)                      | 71 (35)            | 0 (13)                              | 0 (30)             |
| EMS <sup>8</sup> | 100 (42)                     | 88 (8)             | 0 (30)                              | 0 (104)            |

*n*, number of sister pairs examined.

high/low with respect to MS (6/6). Thus, MS, rather than C, may orient the polarity of the ABar division in *mom-2* mutant embryos.

Previous studies have described defects in the orientation of the ABar spindle in *mom-2* mutant embryos (Rocheleau et al., 1997; Thorpe et al., 1997). We found that all of the AB<sup>4</sup> cells have variable defects in spindle orientation (Fig. 5B,D). For example, the ABpl spindle often aligned toward MS or midway between MS and E (Fig. 5D), whereas a wild-type ABpl spindle aligns toward E (Fig. 5C). When an MS, E or C cell from a *mom-2(or42)* embryo was grafted onto an isolated AB<sup>4</sup> cell from a second *mom-2(or42)* embryo, in nearly all cases the AB<sup>4</sup> spindle aligned toward MS or E (7/7 and 6/7, respectively) but only rarely aligned toward C (2/13). Thus, the AB<sup>4</sup> spindle defects in *mom-2* mutant embryos appear to result from the absence of a signal from C, and from an inability to discriminate between competing signals from MS and E.

### POP-1 asymmetry beyond the AB<sup>8</sup> stage

The above results provide evidence that P<sub>1</sub> descendants play an important role in generating POP-1 asymmetry between the AB<sup>8</sup> sister pairs, a stage when POP-1 plays a critical role in specifying a/p differences in cell fate. Surprisingly, we found that if an isolated AB cell was allowed to develop to the AB<sup>16</sup> or AB<sup>32</sup> stages, most of the resulting sister pairs showed POP-1 asymmetry (80%, 45 sister pairs and 97%, 107 sister pairs, respectively; Fig. 3C,D). Although POP-1 asymmetry was never observed between the daughters of an isolated EMS cell (0%, 8 sister pairs), we often observed POP-1 asymmetry between the granddaughters and great-granddaughters (56%, 18 sister pairs and 95%, 40 sister pairs, respectively). Therefore AB and EMS descendants after the AB<sup>8</sup> stage have an ability to generate POP-1 asymmetry that appears to be independent of prior exposure to the signaling cells P<sub>2</sub>, MS, E, P<sub>3</sub> or C.

We wanted to determine whether POP-1 asymmetry in sister pairs of AB<sup>16</sup> cells required signaling between AB descendants. For these experiments we separated AB from P<sub>1</sub>, then separated each of the successive descendants of AB immediately after each cell division. The sequentially isolated cell was allowed to divide one additional time before staining the resulting sister pair for POP-1. As expected, POP-1 asymmetry was not observed between sequentially isolated sister pairs of AB<sup>4</sup> or AB<sup>8</sup> cells (0/11 and 0/10, respectively). In contrast, POP-1 asymmetry was usually present between sequentially isolated sister pairs of AB<sup>16</sup> and AB<sup>32</sup> cells (18/35 and 29/29, respectively; Fig. 3E,F).



**Table 3. Development of sequentially isolated AB<sup>8</sup> cells**

|                                                     | Embryo type |                    |                                     |                    |                    |
|-----------------------------------------------------|-------------|--------------------|-------------------------------------|--------------------|--------------------|
|                                                     | Wild type   | <i>mom-2(or42)</i> | <i>mom-2(RNAi);<br/>mom-1(or10)</i> | <i>mom-5(or52)</i> | <i>mom-4(or39)</i> |
| Daughters with POP-1 asymmetry [%( <i>n</i> )]      | 51 (35)     | 56 (27)            | 58 (12)                             | 0 (28)             | 0 (20)             |
| Granddaughters with POP-1 asymmetry [%( <i>n</i> )] | 100 (32)    | 99 (75)            | 100 (30)                            | 0 (13)             | 0 (19)             |
| Granddaughters aligned linearly [%( <i>n</i> )]     | 94 (32)     | 92 (75)            | 87 (30)                             | 0 (13)             | 84 (19)            |
| Low/high-high/low POP-1 [%( <i>n</i> )]             | 94 (32)     | 91 (75)            | 87 (30)                             | 0 (13)             | 0 (19)             |

*n*, number of isolations examined.

'POP-1 asymmetry' indicates that a sister cell pair within an isolation had a difference in POP-1 levels comparable with wild-type differences.

### MOM-5/Frizzled, but not MOM-2/Wnt, is essential for isolated AB descendants to develop POP-1 asymmetry

Intact *mom-2(or42)* mutant embryos show a variable reduction or loss of POP-1 asymmetry between the EMS daughters and between sister pairs of AB<sup>8</sup> cells (Table 2). However, *mom-2(or42)* mutants and *mom-2(RNAi)* embryos analyzed after the AB<sup>8</sup> stage showed strong POP-1 asymmetry between most sister pairs of AB or EMS descendants (Fig. 2C,D; Table 2 and data not shown). POP-1 polarity was abnormal in these mutants, for example, many transverse sister pairs showed POP-1 asymmetry, and some a/p sister pairs had low/high polarity. We sequentially isolated AB<sup>8</sup> cells from *mom-2(or42)* embryos and from *mom-1(or10); mom-2(RNAi)* double mutant embryos, then allowed these cells to divide once or twice in culture before immunostaining for POP-1. The *mom-1* gene encodes the only *C. elegans* protein related to Prc, and should thus be required for secretion of MOM-2 and other Wnt family members (Kadowaki et al., 1996; Rocheleau et al., 1997). We found that the daughters and granddaughters of the sequentially isolated AB<sup>8</sup> cells usually showed robust POP-1 asymmetry (Table 3). Thus, MOM-2/Wnt is not essential for POP-1 asymmetry after the AB<sup>8</sup> stage, but has a role in POP-1 polarity.

We found that neither the daughters nor granddaughters of a sequentially isolated AB<sup>8</sup> cell from a *mom-5(or57)* mutant embryo showed POP-1 asymmetry (Table 3). Similarly, an AB cell that was isolated from a *mom-5(or57)* mutant and allowed to divide to the AB<sup>16</sup> or AB<sup>32</sup> stages did not show POP-1 asymmetry between any sister pairs (0/8 and 0/4 experiments, respectively). These results suggest that MOM-5/Frizzled has a role in POP-1 asymmetry that is independent of MOM-2/Wnt signaling. Because sister pairs of AB<sup>16</sup> or AB<sup>32</sup> cells usually show POP-1 asymmetry in intact embryos that have been depleted of MOM-5/Frizzled by RNAi or by mutation, we examined intact embryos that were depleted of both MOM-2/Wnt and MOM-5/Frizzled. These latter embryos lacked POP-1 asymmetry in both AB and EMS descendants at the AB<sup>16</sup> and AB<sup>32</sup> stages (Fig. 2E,F; Table 2).

### Interactions resulting in low/high POP-1 polarity

A wild-type, sequentially isolated AB<sup>16</sup> cell can divide into a pair of sister cells with POP-1 asymmetry. However, when two adjacent AB<sup>16</sup> cells were allowed to divide, their spindles almost invariably aligned to generate a line of two sister pairs with low/high-high/low POP-1 polarity (Fig. 3G). This was the case irrespective of whether two sequentially isolated AB<sup>16</sup> cells were combined and allowed to divide once (19/21 experiments), or a sequentially isolated AB<sup>8</sup> cell was allowed

to divide twice (30/32). Identical results were obtained for the sequentially isolated daughters of the EMS cell (5/5). These results suggest that each parental cell aligned the spindle of the other, with a reciprocal induction of low/high POP-1 polarity. Thus, these cells induce low/high POP-1 in the distal/proximal daughters of the responding cell, in contrast to the high/low POP-1 induced by MOM-2/Wnt signaling.

We observed two additional examples in which low/high POP-1 polarity appeared to be induced in the distal/proximal daughters of a responding cell. First, experiments combining an AB<sup>4</sup> cell with an MS, E or C cell, or combining an AB<sup>16</sup> cell with a C cell, resulted in a high/low-high/low pattern of POP-1 polarity (Fig. 5G,H). This pattern is consistent with the hypothesis that the AB<sup>4</sup> cell induced low/high POP-1 polarity in the MS daughters, whereas MS simultaneously induced high/low POP-1 polarity in the AB<sup>4</sup> daughters. The second example involved POP-1 polarity in C and P<sub>3</sub>, the daughters of the P<sub>2</sub> cell (see legend to Fig. 6 for details). In wild-type or *mom-2(or42)* mutant embryos, C is born proximal to ABp and has high POP-1, whereas P<sub>3</sub> is distal and has low POP-1 (Fig. 6A, and see Fig. 1). In a devitellinized embryo, in which P<sub>2</sub> does not contact ABp, we found that POP-1 polarity was reversed in the P<sub>2</sub> daughters (Fig. 6C). We observed the same polarity reversal when isolated EMS and P<sub>2</sub> cells were combined and allowed to divide (Fig. 6E). However, the normal pattern of POP-1 polarity was restored after ABp and ABa cells were grafted onto the P<sub>2</sub> cell of a devitellinized wild-type host embryo (position of blue arrow in Fig. 1). This was the case irrespective of whether the graft ABp and ABa cells originated from wild-type embryos (10/10), or from *mom-2(or42)* mutants (5/5; Fig. 6G). Thus, AB<sup>2</sup> cells can induce low/high POP-1 polarity in the P<sub>2</sub> daughters.

We examined whether MOM-2/Wnt, MOM-1/Prc, MOM-5/Frizzled or MOM-4/MAPKKK are required for the polarized division of adjacent AB<sup>16</sup> cells (the granddaughters of a sequentially isolated AB<sup>8</sup> cell; Table 3). The *mom-2* and *mom-2,mom-1* mutant cells usually had aligned spindles and low/high-high/low POP-1 polarity. In contrast, the cells from *mom-5* or *mom-4* mutants did not show POP-1 asymmetry. The *mom-4* mutant cells usually aligned their spindles, however the *mom-5* mutant cells did not (Table 3). We conclude that MOM-5/Frizzled and MOM-4/MAPKKK, but not MOM-2/Wnt, play a role in low/high POP-1 polarity.

## DISCUSSION

The a/p sister cells in early *C. elegans* embryos have an

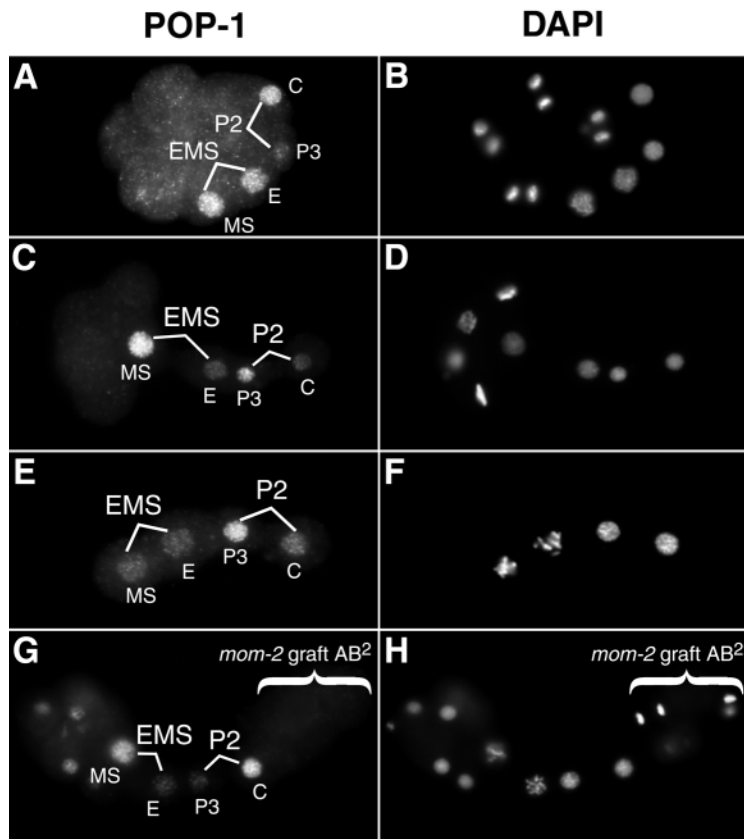

**Fig. 6.** POP-1 asymmetry in the P<sub>2</sub> daughters. (A) *mom-2(or42)* mutant embryo at the AB<sup>4</sup> to AB<sup>8</sup> division. POP-1 is low in P<sub>3</sub> and high in C, as in wild-type embryos; note that the EMS daughters show little if any POP-1 asymmetry. (C) POP-1 in a devitellinized embryo. Note reversal of POP-1 polarity in the P<sub>2</sub> daughters. (E) POP-1 after the division of combined EMS and P<sub>2</sub> cells. The EMS daughters are entering prophase and hence show low POP-1 levels (see legend to Fig. 2). (G) POP-1 in a devitellinized wild-type embryo after grafting AB<sup>2</sup> cells from a *mom-2(or42)* mutant embryo onto P<sub>2</sub>. In all experiments the identity of P<sub>3</sub> was confirmed by cell size and by immunostaining for P granules (data not shown). DAPI staining is shown in B, D, F and H.

invariant high/low POP-1 polarity that is propagated in successive cell divisions. The establishment of this simple pattern appears to involve a complex series of cell interactions. As the 4-cell embryo divides, the EMS spindle is aligned with P<sub>2</sub>, and P<sub>2</sub> signaling results in low levels of nuclear POP-1 in the daughter of EMS proximal to P<sub>2</sub>. The AB<sup>2</sup> cells, called ABa and ABp, divide perpendicular to P<sub>2</sub> and do not respond to P<sub>2</sub> signaling. We have shown that an AB<sup>2</sup> cell can respond to signaling if the AB<sup>2</sup> spindle and P<sub>2</sub> are aligned, either by altering the position of P<sub>2</sub> or by altering the orientation of the AB<sup>2</sup> spindle. In normal development the perpendicular, left/right division of ABp produces daughters with very similar fates, and the parallel differentiation of these left/right daughters is a major source of bilateral symmetry in *C. elegans* (Sulston et al., 1983). If the ABp spindle were to align with P<sub>2</sub>, the a/p division would result in daughters with different levels of POP-1 and presumably different fates.

At the next round of cell division, each AB<sup>4</sup> cell divides into daughters with POP-1 asymmetry, as do the subsequent AB<sup>8</sup> and AB<sup>16</sup> cells. Previous studies reached contradictory conclusions about whether asymmetry in the AB lineage was determined intrinsically or through cell interactions (see Introduction). Our present study provides a resolution of this paradox. We observed POP-1 asymmetry in sister pairs of AB<sup>16</sup> cells, but not AB<sup>8</sup> cells, which were derived from an isolated AB. These results are consistent with those from a previous study that killing P<sub>1</sub> caused posterior to anterior fate transformations at the AB<sup>8</sup> stage; POP-1 remains high in all of the AB<sup>8</sup> cells after P<sub>1</sub> is removed, so all cells should adopt anterior fates (Hutter and Schnabel, 1995). Our results also

support the study of Wittmann et al., which suggested AB descendants had an intrinsic asymmetry independent of P<sub>1</sub>; their study used a transgenic marker that is expressed at the AB<sup>16</sup> stage (Wittmann et al., 1997). Thus, cell interactions are essential for POP-1 asymmetry at, but not after, the AB<sup>8</sup> stage. Reported examples of AB<sup>8</sup> cells that correctly adopted posterior fates after killing or removing P<sub>1</sub> may represent cells in transition between the two modes of generating POP-1 asymmetry (Gendreau et al., 1994; Hutter and Schnabel, 1995).

#### POP-1 asymmetry at the AB<sup>8</sup> stage

Although we propose that cell interactions determine POP-1 asymmetry in the early AB lineage, our results argue against a previous model that the primary interaction is between AB and P<sub>1</sub> (latent polarity model), rather than between AB descendants and P<sub>1</sub> descendants (Hutter and Schnabel, 1995). We have shown that exposing AB to P<sub>1</sub> is not sufficient to generate POP-1 asymmetry at the AB<sup>8</sup> stage, and that P<sub>1</sub> does not provide signaling activity in our assays. In the previous study, laser irradiation of the P<sub>1</sub> descendants did not prevent a/p polarity at the AB<sup>8</sup> stage, suggesting that the P<sub>1</sub> descendants were not essential for polarization (Hutter and Schnabel, 1995). However, laser-irradiation does not effectively prevent P<sub>2</sub> from signaling EMS, nor does it prevent P<sub>2</sub> from signaling ABp through a separate, Notch-related signaling pathway (Mello et al., 1994). All of the known genes that are involved in POP-1 asymmetry in the early embryo are expressed maternally, as are the components of the Notch pathway. Thus, it may be difficult to eliminate translation of maternally provided mRNAs by laser-irradiating the early embryonic cells.

The AB<sup>4</sup> cells contact one or more of the P<sub>1</sub> descendants MS, E, C and P<sub>3</sub>. We have shown that each of these P<sub>1</sub> descendants can induce high/low POP-1 polarity in AB descendants, similar to the ability of P<sub>2</sub> to induce high/low POP-1 polarity in the daughters of EMS. Indeed, at least two of the P<sub>1</sub> descendants, E and C, appear to be fully equivalent to P<sub>2</sub> in their ability to polarize EMS. C and P<sub>2</sub> require MOM-2/Wnt for signaling, however the MS cell appears to provide an additional, or alternative, high/low signal. We presume this unidentified signal is the source of POP-1 asymmetry in the AB<sup>4</sup> daughters in *mom-2* mutants. The *C. elegans* genome can encode five Wnt proteins, raising the possibility that other Wnts contribute to high/low signaling during the first few embryonic cell divisions (Ruvkin and Hobert, 1998).

The AB<sup>4</sup> spindles, in contrast to the AB<sup>2</sup> spindles, align with



the signaling cells P<sub>2</sub>, MS, E or C in cell culture experiments. This difference might result from the synthesis of new regulators in the AB<sup>4</sup> cells, or from the degradation of inhibitors present in the AB<sup>2</sup> cells. In normal development each AB<sup>4</sup> division results in an anterior/posterior pair of daughters. However, all of these divisions are oblique, and some are nearly transverse, with respect to the a/p axis of the egg (see Fig. 5A,C). The alignment of the AB<sup>4</sup> spindles with posterior-localized signaling cells such as E provides a partial explanation for the a/p pattern of high/low POP-1 polarity at the AB<sup>8</sup> stage. In addition, the ability of MS to align the AB<sup>1</sup> spindle may be crucial for the normal pattern of Notch-mediated interactions. MS can interact with the AB<sup>1</sup> daughters through a Notch-like signaling pathway, and the alignment of the AB<sup>1</sup> spindle by MS ensures that only one daughter undergoes this interaction (Mello et al., 1994; Hutter and Schnabel, 1994).

Detailed cell-killing experiments on early *C. elegans* embryos have revealed unexpected and surprisingly complex networks of positive and negative interactions that are involved in the specification of muscle fates and that are presumably integrated for proper development (Schnabel, 1994; Schnabel, 1995). Although the molecular basis of muscle specification is not yet understood, our present study shows that the embryo contains multiple cells with the potential to influence POP-1 polarity. In our cell culture experiments, signaling from E predominated over signaling from MS when an AB<sup>4</sup> cell simultaneously contacted both E and MS. Similarly, we propose that signaling from C predominates over signaling from MS in polarizing the division of AB<sup>2</sup>. The polarity of POP-1 at the AB<sup>2</sup> division is reversed in *mom-2* mutants, presumably because of the absence of a signal from C and the persistence of a non-MOM-2/Wnt signal from MS. An analogous example was found in a previous analysis of the *C. elegans* Wnt family member, EGL-20, which functions in the asymmetric division of a larval epidermal cell called V5. In the absence of EGL-20/Wnt, the normal asymmetry of the V5 division is reversed by signaling from a neighboring cell (Whangbo et al., 2000).

### POP-1 asymmetry after the AB<sup>8</sup> stage

By the AB<sup>16</sup> stage, the descendants of both AB and EMS have an ability to generate POP-1 asymmetry that appears to be independent of prior contact with signaling cells that express MOM-2/Wnt. This conclusion is based on experiments in which cells were sequentially isolated in culture, but is supported by the observation that intact *mom-2;mom-1* mutant embryos show robust POP-1 asymmetry between sister pairs at the AB<sup>16</sup> and later stages. Although sequentially isolated AB<sup>16</sup> cells can divide with POP-1 asymmetry, contact with other AB descendants can determine POP-1 polarity. These interactions induce low/high POP-1 polarity, in contrast to the high/low polarity induced by MOM-2/Wnt signals. Because adjacent AB<sup>16</sup> cells divide with mirror image POP-1 polarity, we assume that each cell can both signal and respond to signaling. Thus, a single, isolated AB<sup>16</sup> cell may generate POP-1 asymmetry through self-signaling.

MOM-5/Frizzled is essential for POP-1 asymmetry in isolated cells that have not been exposed to MOM-2/Wnt signaling. Therefore MOM-5/Frizzled may be a component of the signaling pathway that generates low/high POP-1 polarity independent of MOM-2/Wnt. *Drosophila* Frizzled is an essential component of the planar cell polarity pathway,

however the role of Wnt proteins has not been determined (Lawrence et al., 2002). It will be of interest to determine whether other genes involved in *Drosophila* planar cell polarity have functions in low/high signaling in *C. elegans*. MOM-4/MAPKKK and proteins such as LIT-1/Nemo and WRM-1/Beta-catenin are essential for POP-1 asymmetry in AB descendants, and thus appear to be core components of the asymmetry-generating machinery (this study) (Kaletta et al., 1997; Lin et al., 1998; Meneghini et al., 1999; Rocheleau et al., 1997; Rocheleau et al., 1999).

The observation that POP-1 asymmetry is present in intact *mom-5* mutant embryos, but not in *mom-2;mom-5* double mutant embryos, suggests that MOM-2/Wnt signaling can induce POP-1 asymmetry independent of MOM-5/Frizzled. These results support the view from previous genetic studies that MOM-2/Wnt and MOM-5/Frizzled have overlapping, but distinct roles in the early embryo (Rocheleau et al., 1997; Schlesinger et al., 1999). A survey of gene expression patterns in *C. elegans* embryos has detected Frizzled-related proteins that are candidate receptors for MOM-2/Wnt (Y. Kohara, personal communication; <http://nematode.lab.nig.ac.jp/>). However, our present study indicates that these Frizzleds cannot be functionally redundant with MOM-5 for the POP-1 asymmetry shown by isolated, cultured cells.

When two adjacent AB<sup>8</sup> cells divide in culture they generate a line of two sister pairs with low/high-high/low POP-1 polarity. In an intact, normal embryo, similarly oriented divisions of adjacent AB<sup>8</sup> cells would be expected to produce sister pairs with high/low-high/low POP-1 polarity. Thus, the behavior of the isolated cells does not reproduce the normal pattern of POP-1 polarity. Among the cell culture experiments described here, the only condition that resulted in high/low-high/low POP-1 polarity involved combining a low/high signaling cell (AB<sup>4</sup>) with a high/low signaling cell such as MS, E or C. Thus, it is possible that the normal pattern of POP-1 involves two distinct signaling pathways. We have shown that isolated AB descendants remain responsive to MOM-2/Wnt signaling until at least the AB<sup>16</sup> stage, however we do not yet know whether Wnt signals persist in normal embryos at the AB<sup>16</sup> and later stages.

We are indebted to Marianne Land and Charles S. Rubin for providing the PLK-2 antiserum prior to publication. We thank Rafal Ciosk and Jeremy Nance for a critical reading of the manuscript, Russell Hill for stimulating interest in this project, and current members of the Priess laboratory for advice and assistance. Some of the nematode strains used in this study were provided by the *Caenorhabditis* Genetics Center, which is funded by the NIH National Center for Research Resources (NCRRR). F. Park is supported by the Poncin Scholarship Fund, and J. Priess is supported by the Howard Hughes Medical Institute.

### REFERENCES

- Brenner, S. (1974). The genetics of *Caenorhabditis elegans*. *Genetics* **77**, 71-94.
- Edgar, L. G. (1995). Blastomere culture and analysis. In *Caenorhabditis elegans: Modern Biological Analysis of an Organism*. Vol. 48 (ed. H. F. Epstein and D. C. Shakes), pp. 303-321. San Diego: Academic Press.
- Gendreau, S. B., Moskowitz, I. P., Terns, R. M. and Rothman, J. H. (1994). The potential to differentiate epidermis is unequally distributed in the AB

- lineage during early embryonic development in *C. elegans*. *Dev. Biol.* **166**, 770-781.
- Goldstein, B.** (1992). Induction of gut in *Caenorhabditis elegans* embryos. *Nature* **357**, 255-257.
- Goldstein, B.** (1993). Establishment of gut fate in the E lineage of *C. elegans*: the roles of lineage-dependent mechanisms and cell interactions. *Development* **118**, 1267-1277.
- Goldstein, B.** (1995). An analysis of the response to gut induction in the *C. elegans* embryo. *Development* **121**, 1227-1236.
- Gotta, M. and Ahringer, J.** (2001). Distinct roles for G-alpha and G-beta/gamma in regulating spindle position and orientation in *Caenorhabditis elegans* embryos. *Nat. Cell Biol.* **3**, 297-300.
- Herman, M.** (2001). *C. elegans* POP-1/TCF functions in a canonical Wnt pathway that controls cell migration and in a non-canonical Wnt pathway that controls cell polarity. *Development* **128**, 581-590.
- Hutter, H. and Schnabel, R.** (1994). *glp-1* and inductions establishing embryonic axes in *C. elegans*. *Development* **120**, 2051-2064.
- Hutter, H. and Schnabel, R.** (1995). Specification of anterior-posterior differences within the AB lineage in the *C. elegans* embryo: a polarising induction. *Development* **121**, 1559-1568.
- Kadowaki, T., Wilder, E., Klingensmith, J., Zachary, K. and Perrimon, N.** (1996). The segment polarity gene *porcupine* encodes a putative multitransmembrane protein involved in Wingless processing. *Genes Dev.* **10**, 3116-3128.
- Kaletta, T., Schnabel, H. and Schnabel, R.** (1997). Binary specification of the embryonic lineage in *Caenorhabditis elegans*. *Nature* **390**, 294-298.
- Kawasaki, I., Shim, Y. H., Kirchner, J., Kaminker, J., Wood, W. B. and Strome, S.** (1998). PGL-1, a predicted RNA-binding component of germ granules, is essential for fertility in *C. elegans*. *Cell* **94**, 635-645.
- Korswagen, H. C.** (2002). Canonical and non-canonical Wnt signaling pathways in *Caenorhabditis elegans*: variations on a common signaling theme. *BioEssays* **24**, 801-810.
- Lawrence, P. A., Casal, J. and Struhl, G.** (2002). Towards a model of the organisation of planar polarity and pattern in the *Drosophila* abdomen. *Development* **129**, 2749-2760.
- Lin, R., Hill, R. J. and Priess, J. R.** (1998). POP-1 and anterior-posterior fate decisions in *C. elegans* embryos. *Cell* **92**, 229-239.
- Lin, R., Thompson, S. and Priess, J. R.** (1995). *pop-1* encodes an HMG box protein required for the specification of a mesoderm precursor in early *C. elegans* embryos. *Cell* **83**, 599-609.
- Maduro, M. F., Lin, R. and Rothman, J. H.** (2002). Dynamics of a developmental switch: recursive intracellular and intranuclear redistribution of *Caenorhabditis elegans* POP-1 parallels Wnt-inhibited transcriptional repression. *Dev. Biol.* **248**, 128-142.
- Mango, S. E., Thorpe, C. J., Martin, P. R., Chamberlain, S. H. and Bowerman, B.** (1994). Two maternal genes, *apx-1* and *pie-1*, are required to distinguish the fates of equivalent blastomeres in the early *Caenorhabditis elegans* embryo. *Development* **120**, 2305-2315.
- Mello, C. C., Draper, B. W., Krause, M., Weintraub, H. and Priess, J. R.** (1992). The *pie-1* and *mex-1* genes and maternal control of blastomere identity in early *C. elegans* embryos. *Cell* **70**, 163-176.
- Mello, C. C., Draper, B. W. and Priess, J. R.** (1994). The maternal genes *apx-1* and *glp-1* and establishment of dorsal-ventral polarity in the early *C. elegans* embryo. *Cell* **77**, 95-106.
- Meneghini, M. D., Ishitani, T., Carter, J. C., Hisamoto, N., Ninomiya-Tsujii, J., Thorpe, C. J., Hamill, D. R., Matsumoto, K. and Bowerman, B.** (1999). MAP kinase and Wnt pathways converge to downregulate an HMG-domain repressor in *Caenorhabditis elegans*. *Nature* **399**, 793-797.
- Moskowitz, I. P., Gendreau, S. B. and Rothman, J. H.** (1994). Combinatorial specification of blastomere identity by *glp-1*-dependent cellular interactions in the nematode *Caenorhabditis elegans*. *Development* **120**, 3325-3338.
- Nance, J. and Priess, J. R.** (2002). Cell polarity and gastrulation in *C. elegans*. *Development* **129**, 387-397.
- Neumann, C. J. and Cohen, S. M.** (1997). Long-range action of Wingless organizes the dorsal-ventral axis of the *Drosophila* wing. *Development* **124**, 871-880.
- Rocheleau, C. E., Downs, W. D., Lin, R., Wittmann, C., Bei, Y., Cha, Y. H., Ali, M., Priess, J. R. and Mello, C. C.** (1997). Wnt signaling and an APC-related gene specify endoderm in early *C. elegans* embryos. *Cell* **90**, 707-716.
- Rocheleau, C. E., Yasuda, J., Shin, T. H., Lin, R., Sawa, H., Okano, H., Priess, J. R., Davis, R. J. and Mello, C. C.** (1999). WRM-1 activates the LIT-1 protein kinase to transduce anterior/posterior polarity signals in *C. elegans*. *Cell* **97**, 717-726.
- Ruvkin, G. and Hobert, O.** (1998). The taxonomy of developmental control in *Caenorhabditis elegans*. *Science* **282**, 2033-2041.
- Schlesinger, A., Shelton, C. A., Maloof, J. N., Meneghini, M. and Bowerman, B.** (1999). Wnt pathway components orient a mitotic spindle in the early *Caenorhabditis elegans* embryo without requiring gene transcription in the responding cell. *Genes Dev.* **13**, 2028-2038.
- Schnabel, R.** (1994). Autonomy and nonautonomy in cell fate specification of muscle in the *Caenorhabditis elegans* embryo: a reciprocal induction. *Science* **263**, 1449-1452.
- Schnabel, R.** (1995). Duels without obvious sense: counteracting inductions involved in body wall muscle development in the *Caenorhabditis elegans* embryo. *Development* **121**, 2219-2232.
- Schnabel, R., Hutter, H., Moerman, D. and Schnabel, H.** (1997). Assessing normal embryogenesis in *Caenorhabditis elegans* using a 4D microscope: variability of development and regional specification. *Dev. Biol.* **184**, 234-265.
- Sulston, J. E., Schierenberg, E., White, J. G. and Thomson, J. N.** (1983). The embryonic cell lineage of the nematode *Caenorhabditis elegans*. *Dev. Biol.* **100**, 64-119.
- Tabara, H., Grishok, A. and Mello, C. C.** (1998). RNAi in *C. elegans*: soaking in the genome sequence. *Science* **282**, 430-431.
- Thorpe, C. J., Schlesinger, A., Carter, J. C. and Bowerman, B.** (1997). Wnt signaling polarizes an early *C. elegans* blastomere to distinguish endoderm from mesoderm. *Cell* **90**, 695-705.
- Way, J. C., Wang, L., Run, J.-Q. and Hung, M.** (1994). Cell polarity and the mechanism of asymmetric cell division. *BioEssays* **16**, 925-931.
- Whangbo, J., Harris, J. and Kenyon, C.** (2000). Multiple levels of regulation specify the polarity of an asymmetric cell division in *C. elegans*. *Development* **127**, 4587-4598.
- Wittmann, C., Bossinger, O., Goldstein, B., Fleishmann, M., Kohler, R., Brunschwig, K., Tobler, H. and Muller, F.** (1997). The expression of the *C. elegans* labial-like Hox gene *ceh-13* during early embryogenesis relies on cell fate and on anteroposterior cell polarity. *Development* **124**, 4193-4200.
- Zecca, M., Basler, K. and Struhl, G.** (1996). Direct and long-range action of a Wingless morphogen gradient. *Cell* **87**, 833-844.
- Zwaal, R. R., Ahringer, J., van Luenen, H. G., Rushforth, A., Anderson, P. and Plasterk, R. H.** (1996). G proteins are required for spatial orientation of early cell cleavages in *C. elegans* embryos. *Cell* **86**, 619-629.
